# Supplementary material
Source: PubMed Central journal article supplement (PMC10056960)
Supplement: aem.01884-22-s0001.pdf [file aem.01884-22-s0001.pdf]

## **SUPPLEMENTAL FILE**

### **Ratio of histamine-producing/non-histamine-producing subgroups of *Tetragenococcus halophilus* determines the histamine accumulation during spontaneous fermentation of soy sauce**

Jinjin Ma, Yao Nie, Lijie Zhang\*, Yan Xu\*

Lab of Brewing Microbiology and Applied Enzymology, Key Laboratory of Industrial Biotechnology of Ministry of Education and School of Biotechnology, Jiangnan University, 1800 Lihu Avenue, Wuxi, Jiangsu 214122, China

Running title: Strain specificity related to histamine accumulation

\*Corresponding author. Tel.: +86-510-85918201; Fax: +86-510-85918201.

E-mail address: [yxu@jiangnan.edu.cn](mailto:yxu@jiangnan.edu.cn) (Yan Xu); [zhanglj@jiangnan.edu.cn](mailto:zhanglj@jiangnan.edu.cn) (Lijie Zhang);

Supplemental files include:

Supplemental figures: Fig. S1-S7;

Supplemental tables: Table S1-S2;

## Supplementary figures:

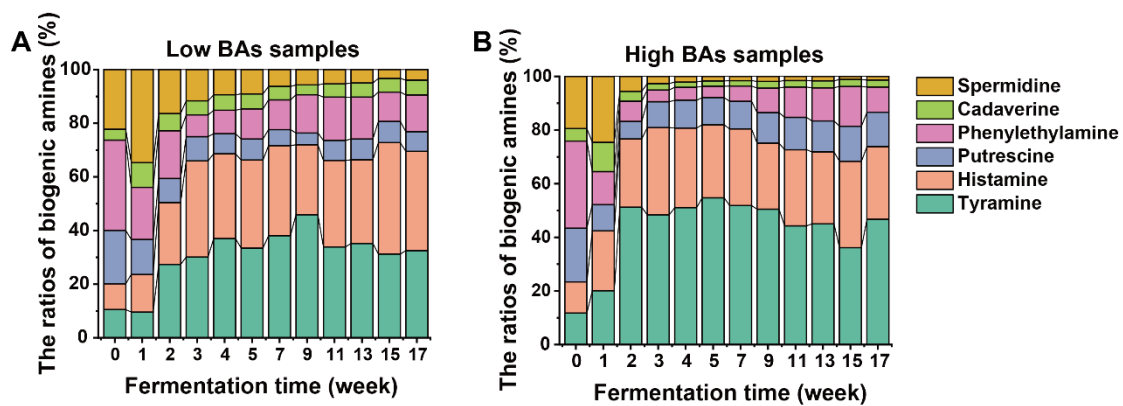

Fig. S1 The profiles of diverse BAs production in low-BAs soy sauce samples (A) and high-BAs soy sauce samples (B).

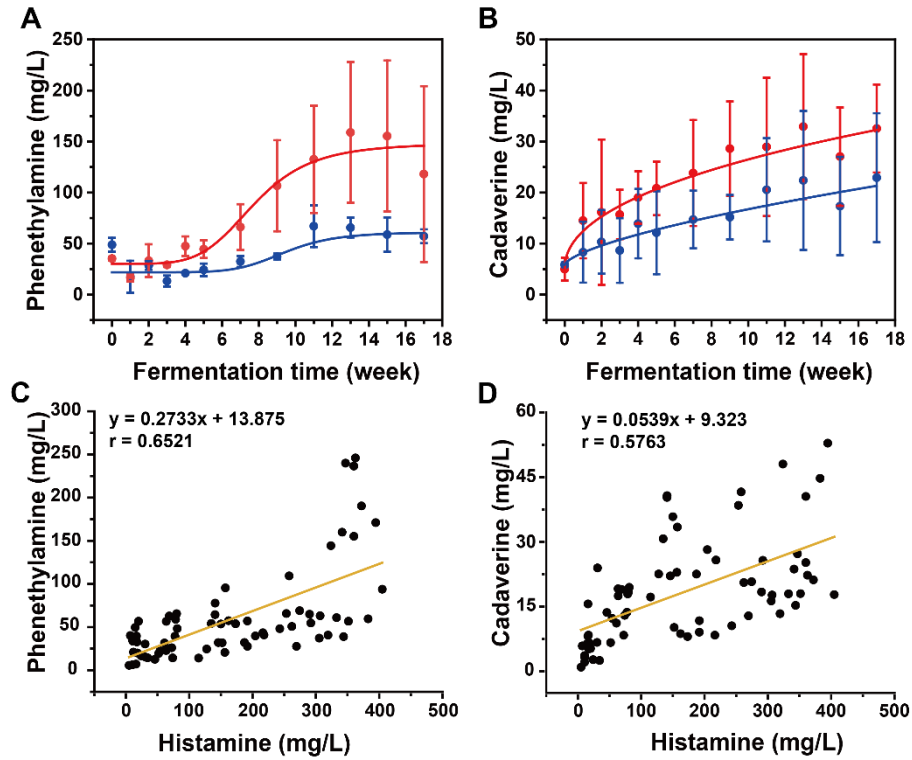

Fig. S2 Biogenic amines during the soy sauce fermentation. Dynamic of biogenic amines accumulation in high- (red line) and low- (blue line) BAs samples (A) Phenethylamine, (B) Cadaverine. Correlation analysis of phenethylamine (C) and cadaverine (D) with histamine. Data are indicated as the average of three samples  $\pm$  standard deviation.

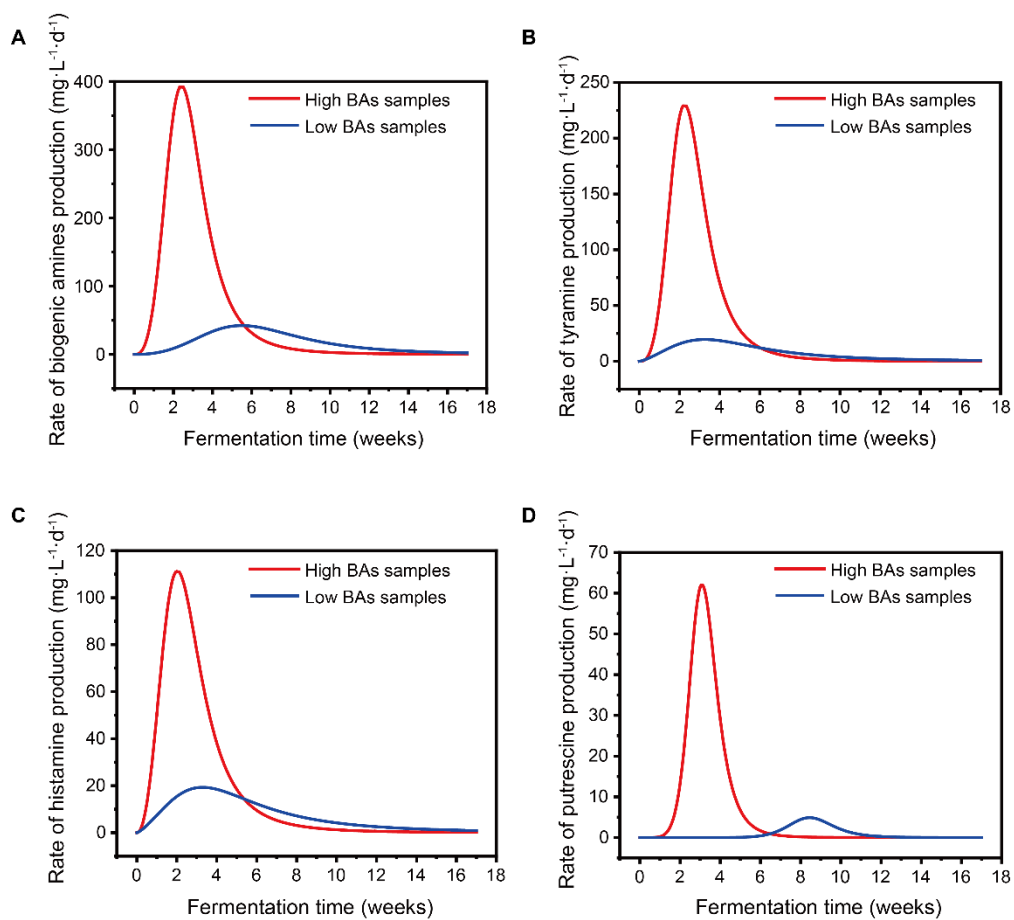

Fig. S3 BAs production rates during soy sauce fermentation. (A) The total of biogenic amines; (B) Tyramine; (C) Histamine; (D) Putrescine.

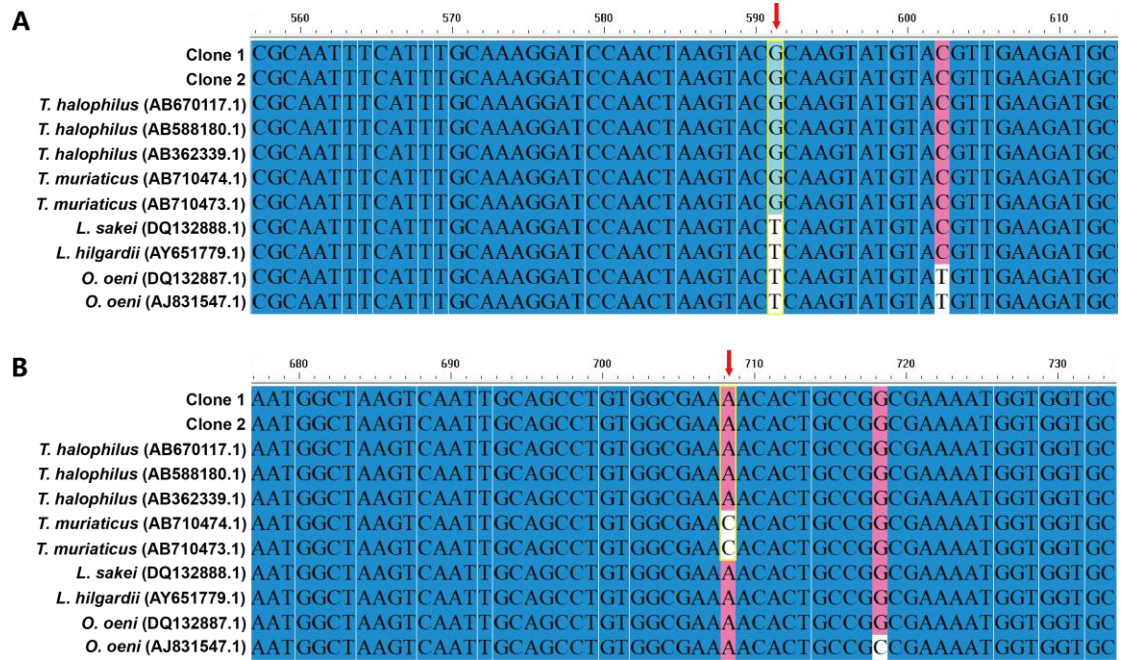

Fig. S4 Partial clone sequence alignment of *hdcA* gene clone library. The red arrows show the key differential bases of the different sequences. Note: Reference genomes from the same species retained only samples with sequence differences.

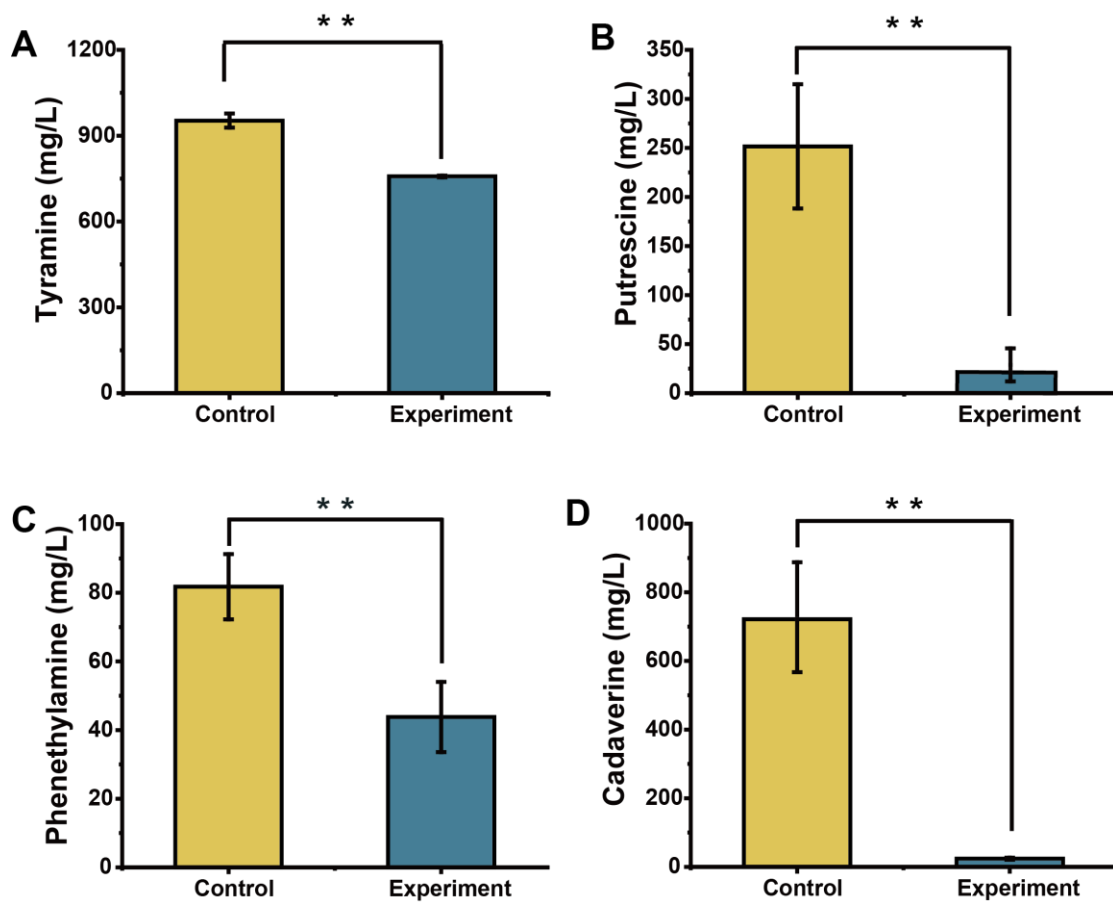

Fig. S5 Four BAs control by artificially modifying the ratio of histamine-producing to non-histamine-producing *T. halophilus* strains during soy sauce fermentation. (A) Tyramine; (B) Putrescine; (C) Phenethylamine; (D) Cadaverine. ANOVA: \*\* means  $p < 0.01$

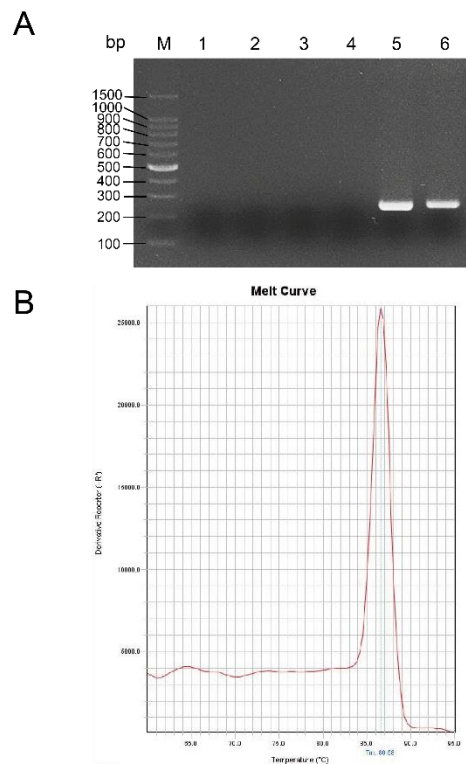

Fig. S6 PCR and qPCR were used to verify the specificity of the primers TetRT-F1 and TetRT-R1, which was used for the quantitative of *T. halophilus*. A: 16 S rRNA amplification of 6 kinds of dominant soy sauce bacteria by using primers TetRT-F1 and TetRT-R1. M. marker; 1. *Weissella paramesenteroides*, 2. *Weissella cibaria*, 3. *Weissella viridescens*, 4. *Weissella confuse*, 5. Histamine-producing *T. halophilus*, 6. Non-histamine-producing *T. halophilus*. B: Melt curve of qPCR.



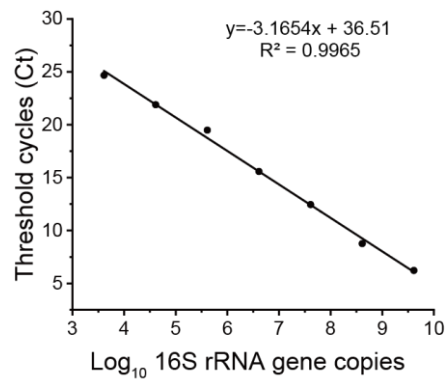

Fig. S7 Real-time quantitative PCR (qPCR) analysis of 10-fold serial dilutions of control plasmid DNA. Cycle threshold values (Ct) are plotted against the calculated plasmid copy number. The equation and R2 value of the regression line are indicated.

## Supplementary tables:

Table 1 Maximum histamine production capacity of the reported histamine-producing microorganisms.

| Histamine-producing Microorganisms                  | Maximum production of histamine<br>(mg/L) | Culture Conditions | References |
|-----------------------------------------------------|-------------------------------------------|--------------------|------------|
| <i>Morganella morganii</i>                          | 6000                                      | TSB medium         | (1)        |
| <i>Tetragenococcus muriaticus</i>                   | 4870                                      | MRSB medium        | (2)        |
| <i>Photobacterium damsela</i> subsp. <i>Damsela</i> | 3670                                      | TSB medium         | (1)        |
| <i>Klebsiella pneumoniae</i>                        | 3416.43                                   | HDB medium         | (3)        |
| <i>Photobacterium phosphoreum</i>                   | 3140                                      | TSB medium         | (1)        |
| <i>Tetragenococcus halophilus</i>                   | 3000                                      | HB medium          | (4)        |
| <i>Morganella psychrotolerans</i>                   | 3000                                      | Canned tuna (fish) | (5)        |
| <i>Klebsiella oxytoca</i>                           | 2231                                      | Broth              | (6)        |
| <i>Staphylococcus epidermidis</i>                   | 1945.9                                    | HEB medium         | (7)        |
| <i>Photobacterium kishitanii</i>                    | 1545                                      | LSW-70 broth       | (8)        |
| <i>Staphylococcus capitis</i>                       | 1260                                      | TSB medium         | (9)        |
| <i>Klebsiella aerogenes</i>                         | 1000                                      | Histidine broth    | (10)       |
| <i>Streptococcus thermophilus</i>                   | 540                                       | LM17 medium        | (11)       |

---

|                                        |        |                       |      |
|----------------------------------------|--------|-----------------------|------|
| <i>Lentilactobacillus saerimneri</i>   | 522.41 | MRSB medium           | (12) |
| <i>Lentilactobacillus parabuchneri</i> | 470.16 | MRSB medium           | (13) |
| <i>Lentilactobacillus buchneri</i>     | 452.38 | MRSB medium           | (12) |
| <i>Lentilactobacillus hilgardii</i>    | 235    | H-MDBmod medium       | (14) |
| <i>Oenococcus oeni</i>                 | 99     | H-MDBmod medium       | (14) |
| <i>Clostridium perfringens</i>         | 41.1   | Decarboxylating broth | (15) |

---

Table S2 Histamine production of *T. halophilus* in MRS medium containing 1% histidine and soy sauce simulated fermentation system

| NO. | Strain                    | source           | <i>hdcA</i> gene | MRS+1% histidine<br>(mg/L) | Simulated soy sauce<br>fermentation<br>(mg/L) |
|-----|---------------------------|------------------|------------------|----------------------------|-----------------------------------------------|
| 1   | <i>T. halophilus</i> H178 | High-BAs samples | +                | 1287.48                    | 555.85                                        |
| 2   | <i>T. halophilus</i> H128 | High-BAs samples | +                | 1286.32                    | 609.61                                        |
| 3   | <i>T. halophilus</i> H168 | High-BAs samples | +                | 1241.23                    | 655.97                                        |
| 4   | <i>T. halophilus</i> L64  | Low BAs samples  | +                | 1221.43                    | 635.27                                        |
| 5   | <i>T. halophilus</i> H181 | High-BAs samples | +                | 1220.83                    | 620.39                                        |
| 6   | <i>T. halophilus</i> H189 | High-BAs samples | +                | 1209.31                    | 617.33                                        |
| 7   | <i>T. halophilus</i> H124 | High-BAs samples | +                | 1207.35                    | 599.12                                        |
| 8   | <i>T. halophilus</i> H42  | High-BAs samples | +                | 1202.8                     | 520.63                                        |
| 9   | <i>T. halophilus</i> H29  | High-BAs samples | +                | 1200.25                    | 515.77                                        |
| 10  | <i>T. halophilus</i> H125 | High-BAs samples | +                | 1184.64                    | 559.59                                        |
| 11  | <i>T. halophilus</i> L100 | Low BAs samples  | +                | 1181.65                    | 684.25                                        |
| 12  | <i>T. halophilus</i> H159 | High-BAs samples | +                | 1170.62                    | 633.9                                         |
| 13  | <i>T. halophilus</i> H156 | High-BAs samples | +                | 1168.66                    | 558.12                                        |
| 14  | <i>T. halophilus</i> L45  | Low BAs samples  | +                | 1164.55                    | 655.06                                        |
| 15  | <i>T. halophilus</i> L137 | Low BAs samples  | +                | 1153.3                     | 540.84                                        |
| 16  | <i>T. halophilus</i> L106 | Low BAs samples  | +                | 1151.65                    | 560.61                                        |
| 17  | <i>T. halophilus</i> L134 | Low BAs samples  | +                | 1151.61                    | 650.03                                        |

|    |                           |                  |   |         |        |
|----|---------------------------|------------------|---|---------|--------|
| 18 | <i>T. halophilus</i> L192 | Low BAs samples  | + | 1146.98 | 512.07 |
| 19 | <i>T. halophilus</i> H45  | High-BAs samples | + | 1145.96 | 655.45 |
| 20 | <i>T. halophilus</i> L40  | Low BAs samples  | + | 1125.15 | 557.12 |
| 21 | <i>T. halophilus</i> H121 | High-BAs samples | + | 1116.27 | 583.21 |
| 22 | <i>T. halophilus</i> H131 | High-BAs samples | + | 1113.86 | 633.19 |
| 23 | <i>T. halophilus</i> H52  | High-BAs samples | + | 1110.21 | 596.89 |
| 24 | <i>T. halophilus</i> L143 | Low BAs samples  | + | 1108.21 | 593.93 |
| 25 | <i>T. halophilus</i> H32  | High-BAs samples | + | 1104.75 | 670.82 |
| 26 | <i>T. halophilus</i> L31  | Low BAs samples  | + | 1103.76 | 634.41 |
| 27 | <i>T. halophilus</i> H180 | High-BAs samples | + | 1091.05 | 622.49 |
| 28 | <i>T. halophilus</i> L15  | Low BAs samples  | + | 1088.45 | 508.68 |
| 29 | <i>T. halophilus</i> H99  | High-BAs samples | + | 1085.82 | 611.1  |
| 30 | <i>T. halophilus</i> L123 | Low BAs samples  | + | 1081.43 | 563.37 |
| 31 | <i>T. halophilus</i> H115 | High-BAs samples | + | 1074.06 | 664.31 |
| 32 | <i>T. halophilus</i> H103 | High-BAs samples | + | 1061.32 | 654.11 |
| 33 | <i>T. halophilus</i> H111 | High-BAs samples | + | 1037.37 | 521.32 |
| 34 | <i>T. halophilus</i> H114 | High-BAs samples | + | 1034.16 | 594.84 |
| 35 | <i>T. halophilus</i> H48  | High-BAs samples | + | 1023.55 | 504.65 |
| 36 | <i>T. halophilus</i> H47  | High-BAs samples | + | 1008.36 | 508.14 |
| 37 | <i>T. halophilus</i> L205 | Low BAs samples  | + | 898.45  | 612.5  |

Note: Data for non-histamine-producing strains were not shown.

## REFERENCES

1. Kanki M, Yoda T, Ishibashi M, Tsukamoto T. 2004. *Photobacterium phosphoreum* caused a histamine fish poisoning incident. Int J Food Microbiol 92:79-87.
2. Kobayashi T, Wang X, Shigeta N, Taguchi C, Ishii K, Shozen K-i, Harada Y, Imada C, Terahara T, Shinagawa A. 2016. Distribution of histamine-producing lactic acid bacteria in canned salted anchovies and their histamine production behavior. Ann Microbiol 66:1277-1284.
3. Özoğul F. 2004. Production of biogenic amines by *Morganella morganii*, *Klebsiella pneumoniae* and *Hafnia alvei* using a rapid HPLC method. Eur Food Res Technol 219:465-469.
4. Satomi M, Furushita M, Oikawa H, Yoshikawa-Takahashi M, Yano Y. 2008. Analysis of a 30 kbp plasmid encoding histidine decarboxylase gene in *Tetragenococcus halophilus* isolated from fish sauce. Int J Food Microbiol 126:202-209.
5. Wang D, Yamaki S, Kawai Y, Yamazaki K. 2020. Histamine production behaviors of a psychrotolerant histamine-producer, *Morganella psychrotolerans*, in various environmental conditions. Curr Microbiol 77:460-467.
6. Lopez-Sabater EI, Rodriguez-Jerez JJ, Roig-Sagues AX, Teresa Mora-Ventura M. 1994. Bacteriological quality of tuna fish (*Thunnus thynnus*) destined for canning: effect of tuna handling on presence of histidine decarboxylase bacteria and histamine level. J Food Prot 57:318-323.
7. Hernández-Herrero MM, Roig-Sagués AX, Rodríguez-Jerez JJ, Mora-Ventura MT. 1999. Halotolerant and halophilic histamine-forming bacteria isolated during the ripening of salted anchovies (*Engraulis encrasicolus*). J Food Prot 62:509-514.
8. Bjornsdottir-Butler K, Abraham A, Harper A, Dunlap P, Benner Jr R. 2018. Biogenic amine production by and phylogenetic analysis of 23

*photobacterium* species. J Food Prot 81:1264-1274.

9. Kung HF, Lee YH, Teng DF, Hsieh PC, Wei CI, Tsai YH. 2006. Histamine formation by histamine-forming bacteria and yeast in mustard pickle products in Taiwan. Food Chem 99:579-585.
10. Torido Y, Ohshima C, Takahashi H, Miya S, Iwakawa A, Kuda T, Kimura B. 2014. Distribution of psychrophilic and mesophilic histamine-producing bacteria in retailed fish in Japan. Food Control 46:338-342.
11. Rossi F, Gardini F, Rizzotti L, La Gioia F, Tabanelli G, Torriani S. 2011. Quantitative analysis of histidine decarboxylase gene (*hdcA*) transcription and histamine production by *Streptococcus thermophilus* PRI60 under conditions relevant to cheese making. Appl Environ Microbiol 77:2817-2822.
12. Sumner SS, Speckhard MW, Somers EB, Taylor SL. 1985. Isolation of histamine-producing *Lactobacillus buchneri* from Swiss cheese implicated in a food poisoning outbreak. Appl Environ Microbiol 50:1094-1096.
13. Diaz M, del Rio B, Sanchez-Llana E, Ladero V, Redruello B, Fernández M, Martín MC, Alvarez MA. 2018. *Lactobacillus parabuchneri* produces histamine in refrigerated cheese at a temperature-dependent rate. Int J Food Sci Technol 53:2342-2348.
14. Landete JM, Ferrer S, Pardo I. 2010. Which lactic acid bacteria are responsible for histamine production in wine? J Appl Microbiol 99:580-586.
15. Moon JS, Cho SK, Choi HY, Kim JE, Kim S-Y, Cho K-J, Han NS. 2010. Isolation and characterization of biogenic amine-producing bacteria in fermented soybean pastes. J Microbiol 48:257-261.
